# Supplementary material for: Atomic defects in pothole-rich two-dimensional copper nanoplates triggering enhanced electrocatalytic selective nitrate-to-ammonia transformation
Source: Royal Society of Chemistry journal article supplement (doi:10.1039/d1ta04743d), 2021-01-01
Supplement: d1ta04743d1.pdf [file d1ta04743d1.pdf]

## Electronic Supplementary Information

### Determination of products

**Detection of nitrate-N.** <sup>[1]</sup> In order to adjust the absorbance to match the range of calibration curves, the electrolytes were diluted 12.5 times. Then, 0.1 mL 1 M HCl and 0.01 mL 0.8 wt.% NH<sub>2</sub>SO<sub>3</sub>H solution were added into 5 mL of diluted electrolyte. After 10 min, the absorption spectrum was recorded at wavelength of 220 nm and 275 nm. The final absorbance was confirmed by the following formula:  $A = A_{220\text{nm}} - 2A_{275\text{nm}}$ . The calibration curve of nitrate is measured by different concentrations of KNO<sub>3</sub>.

**Detection of nitrite-N.** <sup>[1]</sup> First, 400 mg C<sub>6</sub>H<sub>8</sub>N<sub>2</sub>O<sub>2</sub>S, 20 mg C<sub>12</sub>H<sub>14</sub>N<sub>2</sub>·2HCl and 1 mL H<sub>3</sub>PO<sub>4</sub> was dissolved in the 5 mL water to form color developer. Then, 0.1 mL color developer was added into 5 mL of electrolytes which was diluted 20 times. When 20 min later, the absorbance was tested by UV-Vis spectrum and recorded at wavelength of 540 nm. The calibration curve of nitrate is measured by different concentrations of NaNO<sub>2</sub>.

**Detection of ammonium-N.** <sup>[1]</sup> Nessler's reagent was used as color reagent for ammonium-N. A little of post-tested electrolyte was taken out and diluted 20 times. Then, 0.1 mL Nessler's reagent and 0.1 mL of 0.5 g/L C<sub>4</sub>H<sub>4</sub>O<sub>6</sub>KNa·4H<sub>2</sub>O was added to 5 mL diluted electrolyte., and the mixture was left for 20 min. The wavelength of ammonium-N at 420 nm was confirmed using UV-Vis spectrum. And the calibration curve of nitrate is measured by different concentrations of NH<sub>4</sub>Cl.

## Isotope Labeling Experiments.

The isotope labeling nitrate reduction experiment was performed using  $K^{15}NO_3$  as N-source to confirm source of N in ammonia. The electrolyte contained 0.5 M  $K_2SO_4$  and 50 ppm  $K^{15}NO_3$ .  $^{15}N$  was added into electrolytic cell as the reactant. Then, the pH value of the cathode electrolyte was adjusted to 1~2 by 4 M  $H_2SO_4$  after electrocatalytic procedure in order to confirm that the N-source is nitrate reduction. The standard reference material used is  $K^{15}NO_3$  and  $^{15}NH_4Cl$ .

**Calculation of yield, selectivity and Faradaic efficiency:** The calculation source of all results is provided by the absorbance measured by the UV-Vis spectrophotometer.

The result of yield is obtained by Eq. 1:

$$Yield_{NH_3} = (c_{NH_3} \times V) / (t \times m) \quad (1)$$

The result of conversion rate is obtained by Eq. 2:

$$Conversion_{NO_3^-} = \Delta c_{NO_3^-} / c_0 \times 100\% \quad (2)$$

The result of  $NO_2^-$  selectivity is obtained by Eq. 3:

$$Selectivity = c_{NO_2^-} / \Delta c_{NO_3^-} \times 100\% \quad (3)$$

The result of  $NH_3$  selectivity is obtained by Eq. 4:

$$Selectivity = c_{NH_3} / \Delta c_{NO_3^-} \times 100\% \quad (4)$$

The Faradaic efficiency (FE) of nitrate reduction was obtained by Eq 5:

$$FE = (8F \times c_{NH_3} \times V) / (M_{NH_3} \times Q) \quad (5)$$

Here,  $c_{NH_3}$  is the mass concentration of  $NH_3$  in the cathode electrolyte after the test,  $V$  is the volume of electrolyte in the cathode,  $M_{NH_3}$  is the molar mass of  $NH_3$ ,  $t$  is the electrocatalytic time,  $m$  is the mass of the catalyst on the working electrode,  $\Delta c_{NO_3^-}$  is the difference in the concentration of nitrate in the catholyte before and after electrocatalytic,  $c_0$  is the actual concentration of nitrate in the electrolyte,  $c$  is the concentration of nitrite or ammonia

in the catholyte after electrolysis,  $F$  is the Faradaic constant ( $96485 \text{ C mol}^{-1}$ ),  $Q$  is the total charge pass electrode during the electrochemical process.

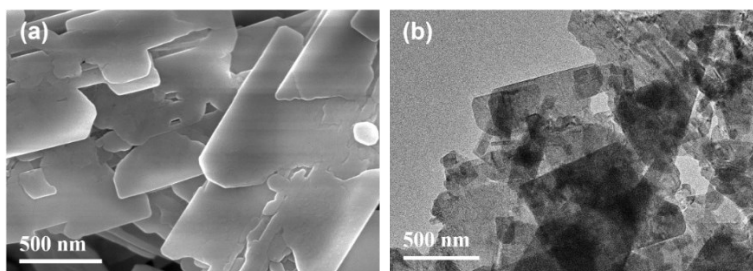

**Fig. S1** (a) SEM image and (b) TEM image of CuO NPs.

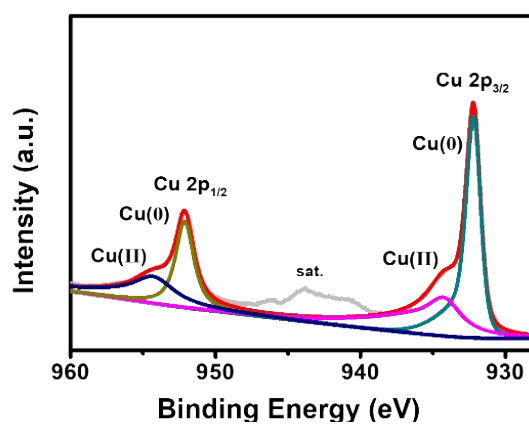

**Fig. S2** Cu 2p XPS spectrum of *dr*-Cu NPs.

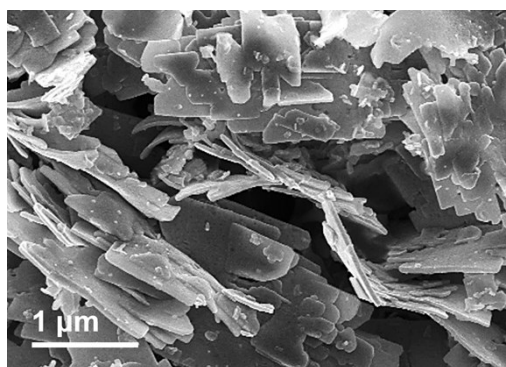

**Fig. S3** SEM image of *dr*-Cu NPs.

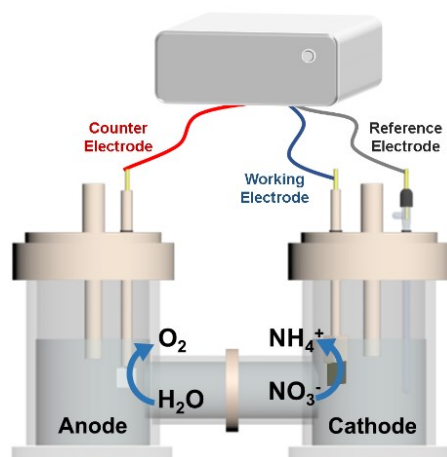

**Fig. S4.** The electrocatalytic reduction of nitrate to ammonia in an H-type electrolytic cell.

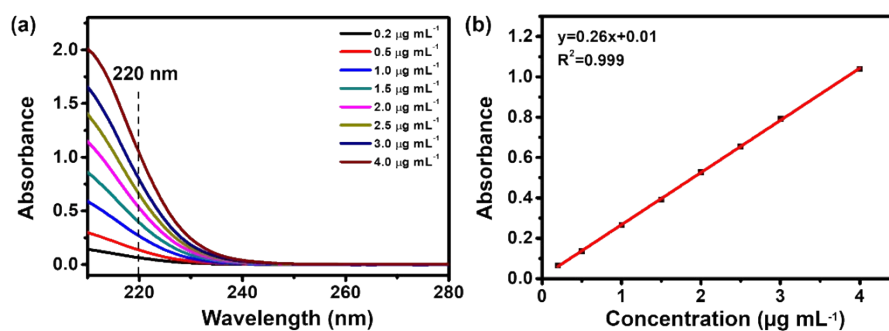

**Fig. S5** (a) The absorbance of different  $\text{NaNO}_3$  concentration ranging from  $0.2 \mu\text{g mL}^{-1}$  to  $4.0 \mu\text{g mL}^{-1}$  (b) The concentration-absorbance calibration curves of nitrate-N.

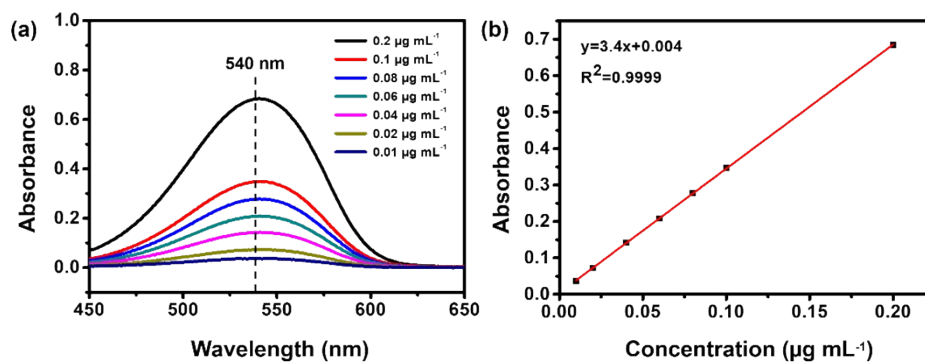

**Fig. S6** (a) The absorbance of different  $\text{NaNO}_2$  concentration ranging from  $0.01 \mu\text{g mL}^{-1}$  to  $0.2 \mu\text{g mL}^{-1}$  (b) The concentration-absorbance calibration curves of nitrite-N.

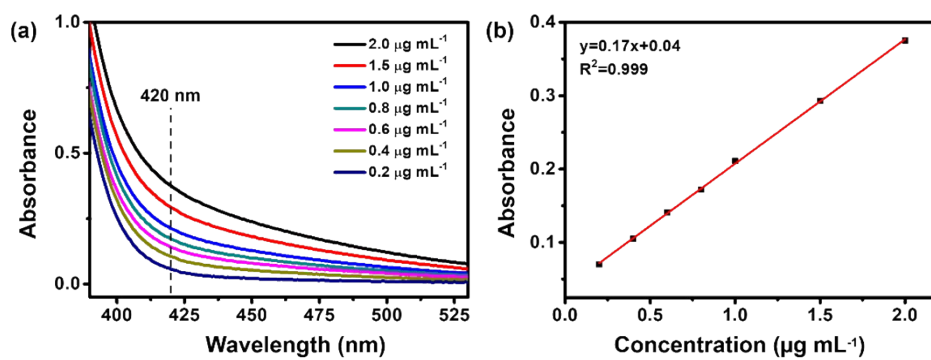

**Fig. S7** (a) The absorbance of different  $\text{NH}_4\text{Cl}$  concentration ranging from 0.2  $\mu\text{g mL}^{-1}$  to 2  $\mu\text{g mL}^{-1}$  (b) The concentration-absorbance calibration curves of ammonium-N.

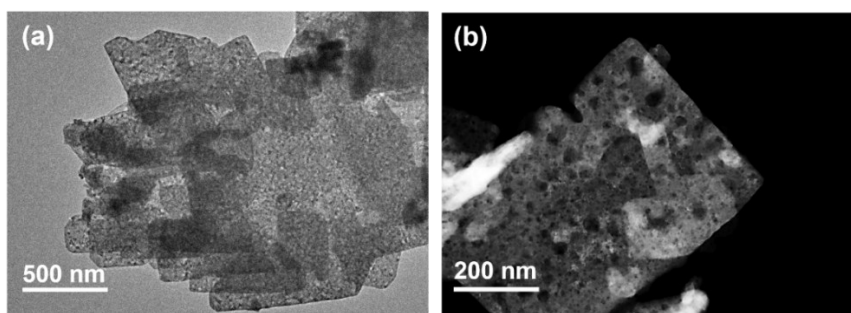

**Fig. S8** (a) TEM image and (b) HAADF-SEM image of *dr*-Cu NPs after electrocatalytic nitrate reduction testing.

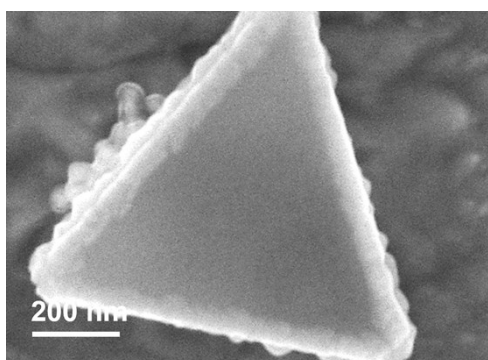

**Fig. S9** SEM image of *df*-Cu NPs.

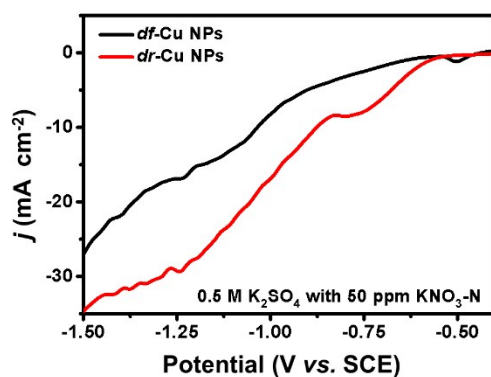

**Fig. S10** LSV curves of *df*-Cu NPs and *dr*-Cu NPs in 0.5 M  $K_2SO_4$  with 50 ppm  $KNO_3$ -N.

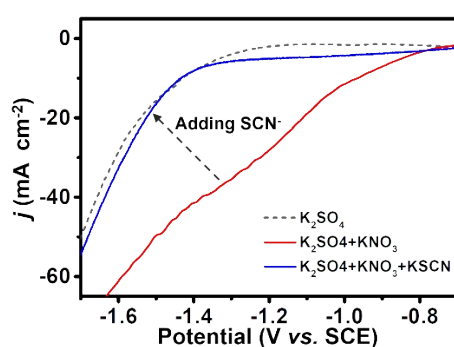

**Fig. S11** LSV curves of *dr*-Cu NPs in 50 ppm  $KNO_3$ -N with and without 50 ppm  $SCN^-$ .

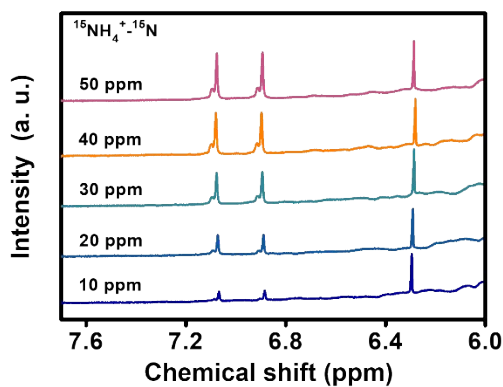

**Fig. S12** The  $^1H$  NMR spectra (600 MHz) of  $^{15}NH_4^+$  with different  $^{15}NH_4^+$ - $^{15}N$  concentration. The proton signal of maleic acid appears at  $\delta = 6.31$  ppm. The  $^1H$  NMR spectra of  $^{15}NH_4^+$  showed double peaks at  $\delta = 7.10$  and 6.98 ppm.

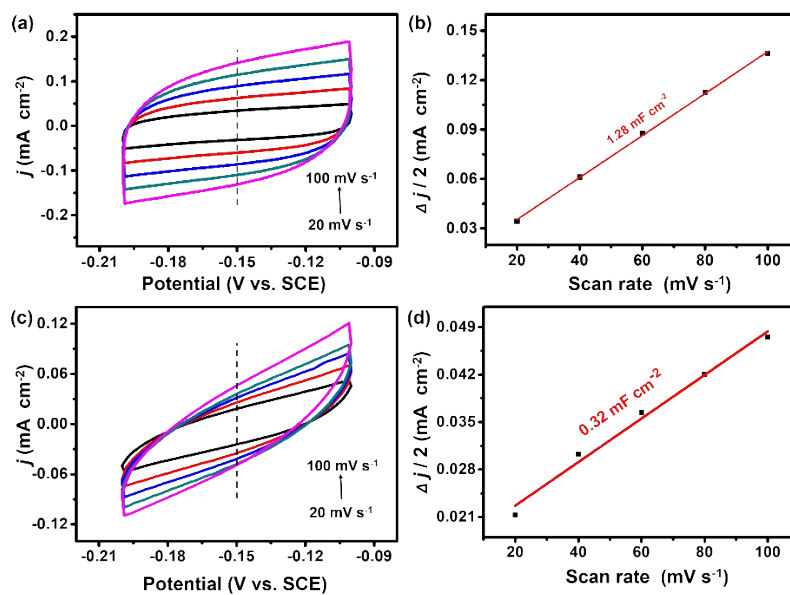

**Fig. S13** (a) CV curves of *dr*-Cu NPs, (b) Plots of the current density versus the scan rate for *dr*-Cu NPs, (c) CV curves of *df*-Cu NPs with various scan rates from 20 to 100 mV s<sup>-1</sup> and (d) Plots of the current density versus the scan rate for *df*-Cu NPs.

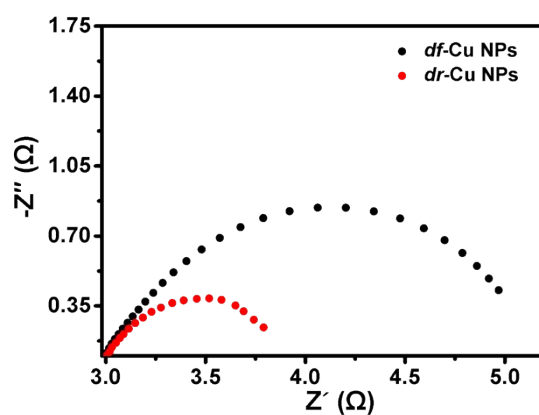

**Fig. S14** EIS of *dr*-Cu NPs and *df*-Cu NPs.

**Table S1** The comparisons of NO<sub>3</sub>RR performance for the *dr*-Cu NPs and some other reported electrocatalysts.

| Electrocatalyst                                      | Electrolyte                                                                                                  | NO <sub>3</sub> <sup>-</sup> conversion | Ammonia Selectivity | Ref.             |
|------------------------------------------------------|--------------------------------------------------------------------------------------------------------------|-----------------------------------------|---------------------|------------------|
| <b><i>dr</i>-Cu NPs</b>                              | <b>50 ppm NO<sub>3</sub><sup>-</sup>-N + 0.5 M K<sub>2</sub>SO<sub>4</sub></b>                               | <b>93.26%</b>                           | <b>81.99%</b>       | <b>This work</b> |
| Fe                                                   | 50 ppm NO <sub>3</sub> <sup>-</sup> -N + 0.5 g/L Na <sub>2</sub> SO <sub>4</sub>                             | 91%                                     | 28%                 | [2]              |
| Pd-Fe foam                                           | 50 ppm NO <sub>3</sub> <sup>-</sup> -N + 413 ppm K <sub>2</sub> HCO <sub>3</sub> + 172 ppm CaSO <sub>4</sub> | 39.8%                                   | 92%                 | [3]              |
| Fe (20%)@N-C                                         | 50 ppm NO <sub>3</sub> <sup>-</sup> -N + 50 mM Na <sub>2</sub> SO <sub>4</sub>                               | 83.0%                                   | <75%                | [4]              |
| Cu/Ti + Cu/AC                                        | 50 ppm NO <sub>3</sub> <sup>-</sup> -N                                                                       | 96.05%                                  | 62.64%              | [5]              |
| Cu/Ti                                                | 50 ppm NO <sub>3</sub> <sup>-</sup> -N + 0.5 mg/L Na <sub>2</sub> SO <sub>4</sub>                            | 71.8%                                   | N.A.                | [6]              |
| Ni-Fe <sup>0</sup> @Fe <sub>3</sub> O <sub>4</sub>   | 50 ppm NO <sub>3</sub> <sup>-</sup> -N + 10 mM NaCl                                                          | 90.2%                                   | 10.4%               | [7]              |
| BDD                                                  | 50 ppm NO <sub>3</sub> <sup>-</sup> -N + 0.1 g/L Na <sub>2</sub> SO <sub>4</sub>                             | 42%                                     | 8.9%                | [8]              |
| Pd-Cu/γAl <sub>2</sub> O <sub>3</sub>                | 50 ppm NO <sub>3</sub> <sup>-</sup> -N                                                                       | 100%                                    | 19.6%               | [9]              |
| Pd <sub>0.4</sub> Cu <sub>0.6</sub>                  | 50 ppm NaNO <sub>3</sub>                                                                                     | N. A.                                   | 49%                 | [10]             |
| Co <sub>3</sub> O <sub>4</sub> -TiO <sub>2</sub> /Ti | 50 ppm NO <sub>3</sub> <sup>-</sup> + 0.1 M Na <sub>2</sub> SO <sub>4</sub> + PVP + 1000 ppm Cl <sup>-</sup> | 89%                                     | 24%                 | [11]             |
| Cu/Ni/20-min                                         | 50 ppm NO <sub>3</sub> <sup>-</sup> -N + 0.1 M K <sub>2</sub> SO <sub>4</sub>                                | 97.2%                                   | 66.6%               | [12]             |
| Ni-TNTA                                              | 50 ppm NO <sub>3</sub> <sup>-</sup> -N                                                                       | 89.6%                                   | N.A.                | [13]             |
| Pt nanoparticle                                      | 50 ppm NO <sub>3</sub> <sup>-</sup> -N                                                                       | 35%                                     | N.A.                | [14]             |



## References

- [1] Y. Wang, W. Zhou, R. Jia, Y. Yu, B. Zhang, *Angew. Chem. Int. Ed.* **2020**, *59*, 5350-5354
- [2] W. Li, C. Xiao, Y. Zhao, Q. Zhao, R. Fan, J. Xue, *Catal. Lett.* **2016**, *146*, 2585-2595.
- [3] L. Rajic, D. Berroa, S. Gregor, S. Elbakri, M. MacNeil, A. N. Alshwabkeh, *Int. J. Electrochem. Sci.* **2017**, *12*, 5998-6009.
- [4] W. Duan, G. Li, Z. Lei, T. Zhu, Y. Xue, C. Wei, C. Feng, *Water. Res.* **2019**, *161*, 126-135.
- [5] Q. Wang, H. Huang, L. Wang, Y. Chen, *Environ. Sci. Pollut. Res. Int.* **2019**, *26*, 17567-17576.
- [6] F. Liu, *Int. J. Electrochem. Sci.* **2016**, 8308-8322.
- [7] Z. A. Jonoush, A. Rezaee, A. Ghaffarinejad, *J. Clean. Prod.* **2020**, *242*, 5998 – 6009.
- [8] P. Kuang, K. Natsui, Y. Einaga, *Chemosphere* **2018**, *210*, 524-530.
- [9] Z. Zhang, Y. Xu, W. Shi, W. Wang, R. Zhang, X. Bao, B. Zhang, L. Li, F. Cui, *Chem. Eng. J.* **2016**, *290*, 201-208.
- [10] J. F. Su, I. Ruzybayev, I. Shah, C. P. Huang, *Appl. Catal. B* **2016**, *180*, 199-209.
- [11] J. Gao, B. Jiang, C. Ni, Y. Qi, Y. Zhang, N. Oturan, M. A. Oturan, *Appl. Catal. B* **2019**, *254*, 391-402.
- [12] Y.-J. Shih, Z.-L. Wu, Y.-H. Huang, C.-P. Huang, *Chem. Eng. J.* **2020**, *383*, 123157.
- [13] F. Liu, K. Liu, M. Li, S. Hu, J. Li, X. Lei, X. Liu, *Chemosphere* **2019**, *223*, 560-568.
- [14] Q. Wang, X. Zhao, J. Zhang, X. Zhang, *J. Electroanal. Chem.* **2015**, *755*, 210-214.
